# Supplementary material
Source: PubMed Central journal article supplement (PMC5920701)
Supplement: NIHMS952208-supplement-Supplemental_Material.pdf [file NIHMS952208-supplement-Supplemental_Material.pdf]

## Supplemental Material

### Supplemental Figures and Figure Legends

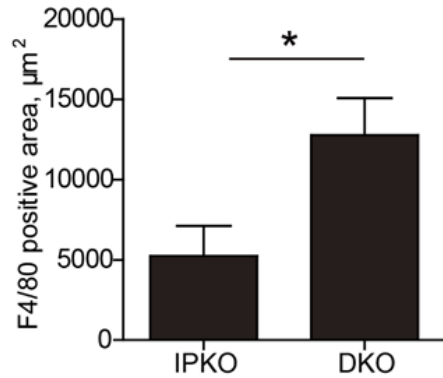

**Supplemental Figure I . Quantification of F4/80 positive area in the vessels from IPKO and DKO mice 7 days after injury.** n=4 IPKO, 5 DKO; \*P<0.05; Student's unpaired t-test.

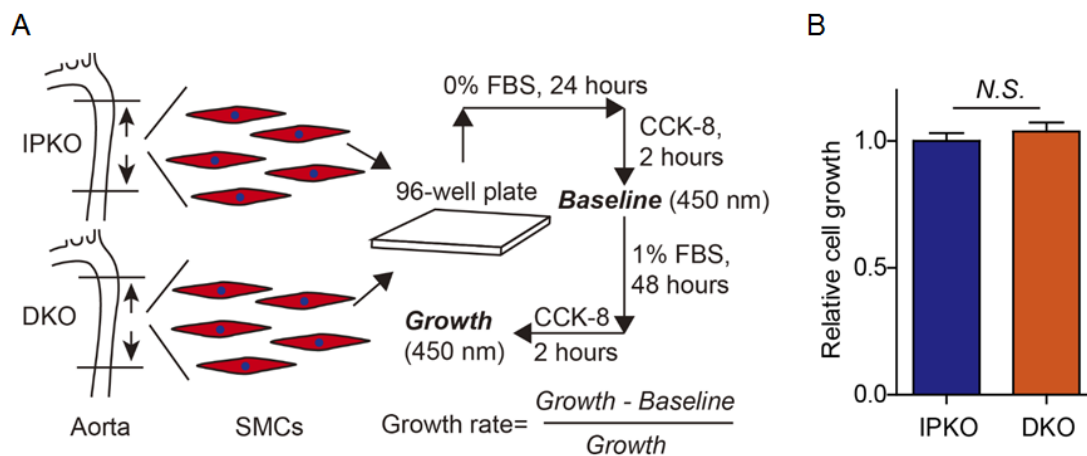

**Supplemental Figure II . Determination of proliferation of the aortic smooth muscle cells isolated from IPKO and DKO mice.**

Smooth muscle cells (SMCs) were isolated from the descending aortae of IPKO and DKO mice, and their cell proliferation was analyzed in vitro (A) and compared (B). n=8 wells from 2 independent experiments.

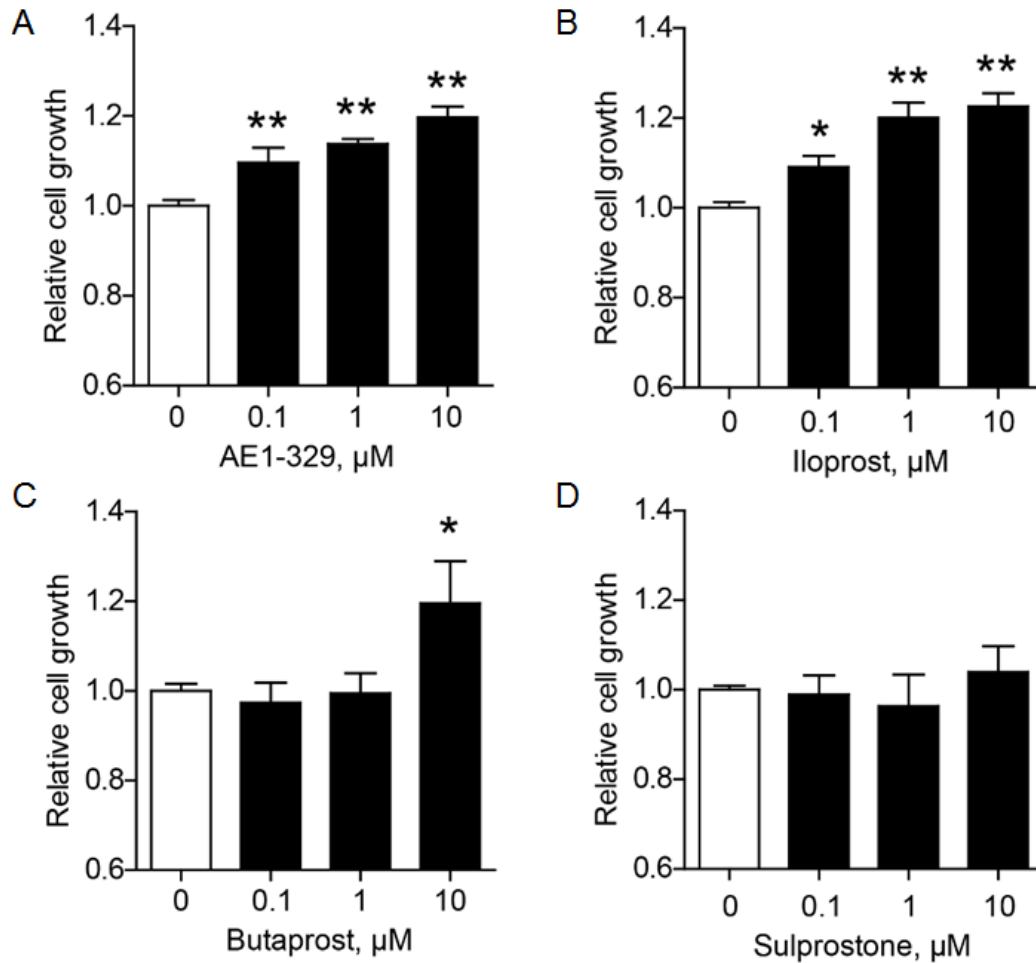

**Supplemental Figure III. The concentration-response of AE1-329 (A), iloprost (B), butaprost (C) and sulprostone (D) on endothelial proliferation.** n=9 wells from three independent experiments; \*p<0.05, \*\*p<0.01, One-way ANOVA with Turkey's post tests.

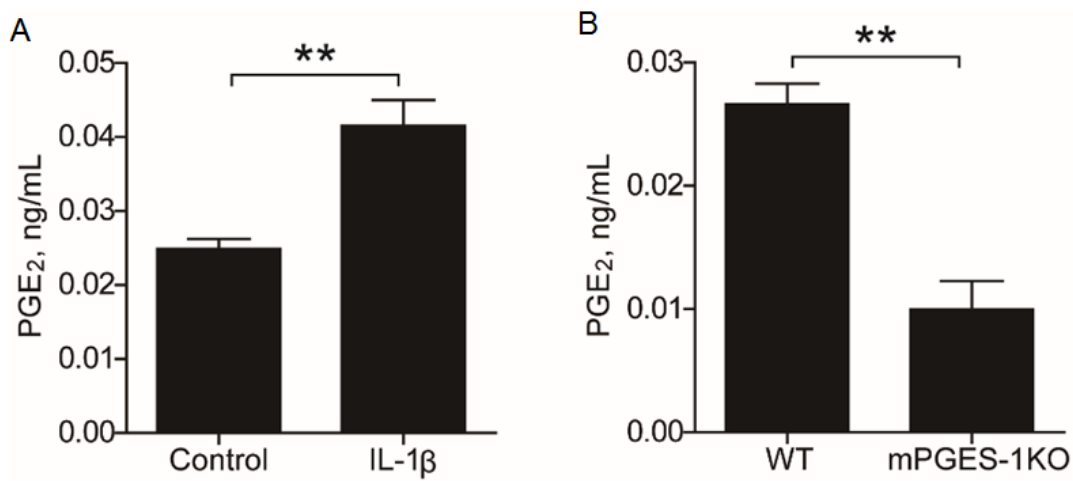

**Supplemental Figure IV. Supernatant PGE<sub>2</sub> levels of cultured mouse aortic endothelial cells (MAECs) determined by HPLC-MS/MS method.**

MAECs were treated with vehicle (Control) or IL-1 $\beta$  (10 ng/mL) for 12 hours, PGE<sub>2</sub> levels were shown (A). Supernatant levels of PGE<sub>2</sub> were significantly depressed in mPGES-1 deficient (mPGES-1KO) MAECs, compared with that in wildtype (WT) cells (B). n=4, \*\*P<0.01; Student's unpaired t-test.

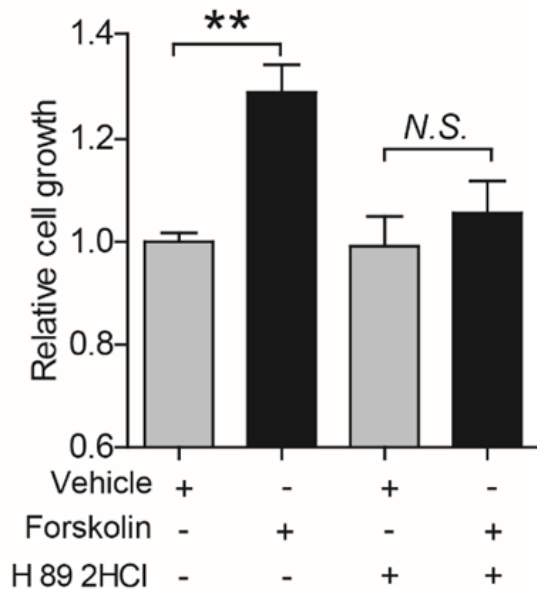

**Supplemental Figure V. Forskolin (an adenylate cyclase activator, 3  $\mu$ mol/L) promoted endothelial proliferation, which were blunted by H89 2HCl (a PKA inhibitor). n=7; \*\*P<0.01; One-way ANOVA with Bonferroni's post-test.**

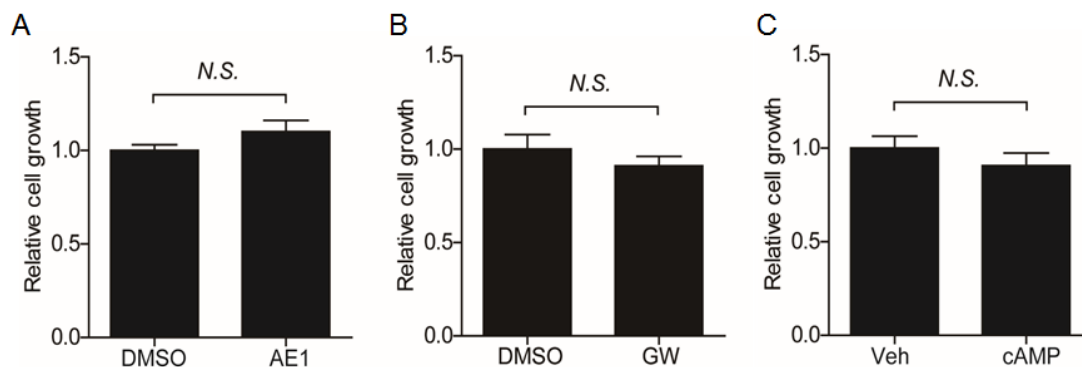

**Supplemental Figure VI. AE1-329, GW627368X and db-cAMP did not affect EC proliferation under condition of PKA inhibition.**

When MAECs were treated with PKI (a PKA inhibitor, 10  $\mu$ mol/L), EP4 agonist (AE1-329, abbreviated as AE1, 1  $\mu$ mol/L), EP4 antagonist (GW627368X, abbreviated as GW, 1  $\mu$ mol/L), or db-cAMP (a cell permeable cAMP analogue, 30  $\mu$ mol/L) failed to affect cell proliferation. Each result was from three independent data sets.

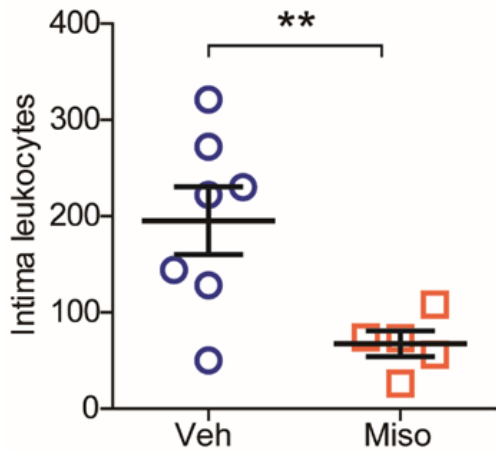

**Supplemental Figure VII. Misoprostol administration (100 µg/Kg, i.p., three times a day) decreased the number of leukocytes infiltrated to intima, as examined at 7 days after the vascular injury. \*\*P<0.01; Student's unpaired t-test.**

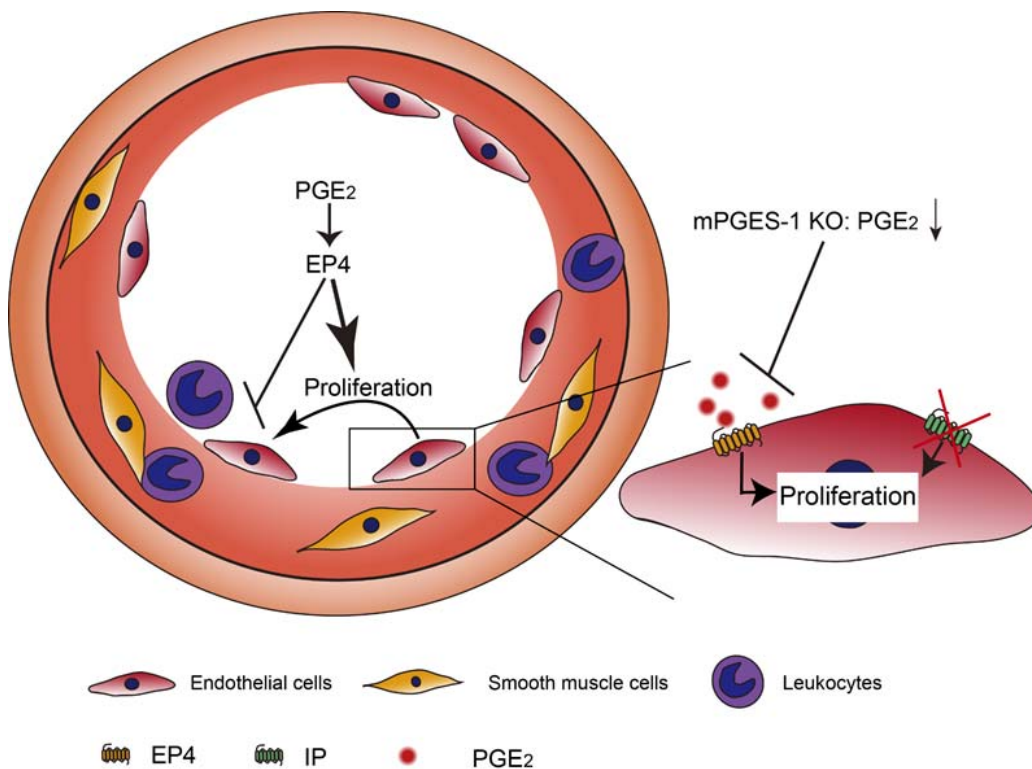

**Supplemental Figure VIII. Schematic illustration of the mechanism of mPGES-1 derived PGE<sub>2</sub> in the vascular response to injury.**

Knockout of mPGES-1 decreases PGE<sub>2</sub>, and increases PGI<sub>2</sub>. In IP deficient mice, a protective role of mPGES-1 derived PGE<sub>2</sub> was discovered. PGE<sub>2</sub>, via EP4 receptor on endothelial cells, stimulates endothelial proliferation, suppresses leukocytes adhering to endothelial cells, and protected the injured vessels against development of neointimal hyperplasia. Arrow indicates stimulating effect, while line with a blunt end indicates inhibitory effect.

## Supplemental Tables

**Supplemental Table I . Data analysis with gender information in the IPKOs and DKO.**

| Gender                       | Male               |                    | Female            |                   | Gender mixed       |                    |
|------------------------------|--------------------|--------------------|-------------------|-------------------|--------------------|--------------------|
| Genotype                     | IPKO               | DKO                | IPKO              | DKO               | IPKO               | DKO                |
| Intima area<br>(28 days)     | 24.1±2.7<br>(n=10) | 44.6±6.4<br>(n=10) | 20.3±5.9<br>(n=4) | 38.5±3.3<br>(n=6) | 23±2.5<br>(n=14)   | 42.3±4.2<br>(n=16) |
| Ratio of I to M<br>(28 days) | 1.85±0.2<br>(n=10) | 2.39±0.2<br>(n=10) | 1.15±2.7<br>(n=4) | 2.68±0.3<br>(n=6) | 1.69±0.2<br>(n=14) | 2.5±0.17<br>(n=16) |
| Intima area<br>(7 days)      | 16.3±2.5<br>(n=11) | 22.4±3.2<br>(n=12) | 12.5±0.5<br>(n=3) | 21.4±0.9<br>(n=4) | 15.5±2.0<br>(n=14) | 22.1±2.4<br>(n=16) |
| Ratio of I to M<br>(7 days)  | 1.05±0.2<br>(n=11) | 1.68±0.3<br>(n=12) | 1.14±0.1<br>(n=3) | 1.84±0.2<br>(n=4) | 1.12±0.1<br>(n=14) | 1.72±0.2<br>(n=16) |
| Intima<br>leukocytes         | 140±17<br>(n=5)    | 193±26<br>(n=5)    | 161±23<br>(n=3)   | 246±21<br>(n=5)   | 148±13<br>(n=8)    | 219±18<br>(n=10)   |
| Reendotheliali<br>zation (%) | 49.0±3.0<br>(n=6)  | 38.0±2.7<br>(n=5)  | 47.7<br>(n=1)     | 41.9±6.6<br>(n=2) | 48.8±2.5<br>(n=7)  | 39.2±2.5<br>(n=7)  |

Note: Area ( $\times 10^3 \mu\text{m}^2$ ).

**Supplemental Table II . Data analysis with gender information in the EP4 Ctl and EP4 cKOs.**

| Gender                       | Male              |                   | Female            |                   | Gender mixed       |                    |
|------------------------------|-------------------|-------------------|-------------------|-------------------|--------------------|--------------------|
| Genotype                     | EP4 Ctl           | EP4 cKO           | EP4 Ctl           | EP4 cKO           | EP4 Ctl            | EP4 cKO            |
| Intima area<br>(28 days)     | 19.3±4.1<br>(n=6) | 30.5±6.7<br>(n=4) | 17.1±2.6<br>(n=8) | 23.4±3.0<br>(n=6) | 18±2.2<br>(n=14)   | 26.2±3.2<br>(n=10) |
| Ratio of I to M<br>(28 days) | 1.20±0.3<br>(n=6) | 2.14±0.3<br>(n=4) | 1.26±0.2<br>(n=8) | 1.76±0.4<br>(n=6) | 1.24±0.1<br>(n=14) | 1.91±0.3<br>(n=10) |
| Intima area<br>(7 days)      | 11.6±1.7<br>(n=5) | 20.6±4.0<br>(n=5) | 8.1±2.4<br>(n=2)  | 11.7±0.7<br>(n=2) | 10.7±1.4<br>(n=7)  | 18.3±3.2<br>(n=7)  |
| Ratio of I to M<br>(7 days)  | 0.66±0.2<br>(n=5) | 1.37±0.2<br>(n=5) | 0.61±0.2<br>(n=2) | 1.15±0.1<br>(n=2) | 0.65±0.1<br>(n=7)  | 1.31±0.1<br>(n=7)  |
| Intima<br>leukocytes         | 57±15<br>(n=6)    | 105±17<br>(n=6)   | 33±8<br>(n=2)     | 41±13<br>(n=2)    | 51±12<br>(n=8)     | 89±16<br>(n=8)     |
| Reendotheliali<br>zation (%) | 62.3±5.7<br>(n=6) | 42.1±7.0<br>(n=5) | 59.6<br>(n=1)     | 39.6±5.2<br>(n=2) | 61.9±4.8<br>(n=7)  | 41.3±4.6<br>(n=7)  |

Note: Area ( $\times 10^3 \mu\text{m}^2$ ).
