# Supplementary material
Source: PubMed Central journal article supplement (PMC5920701)

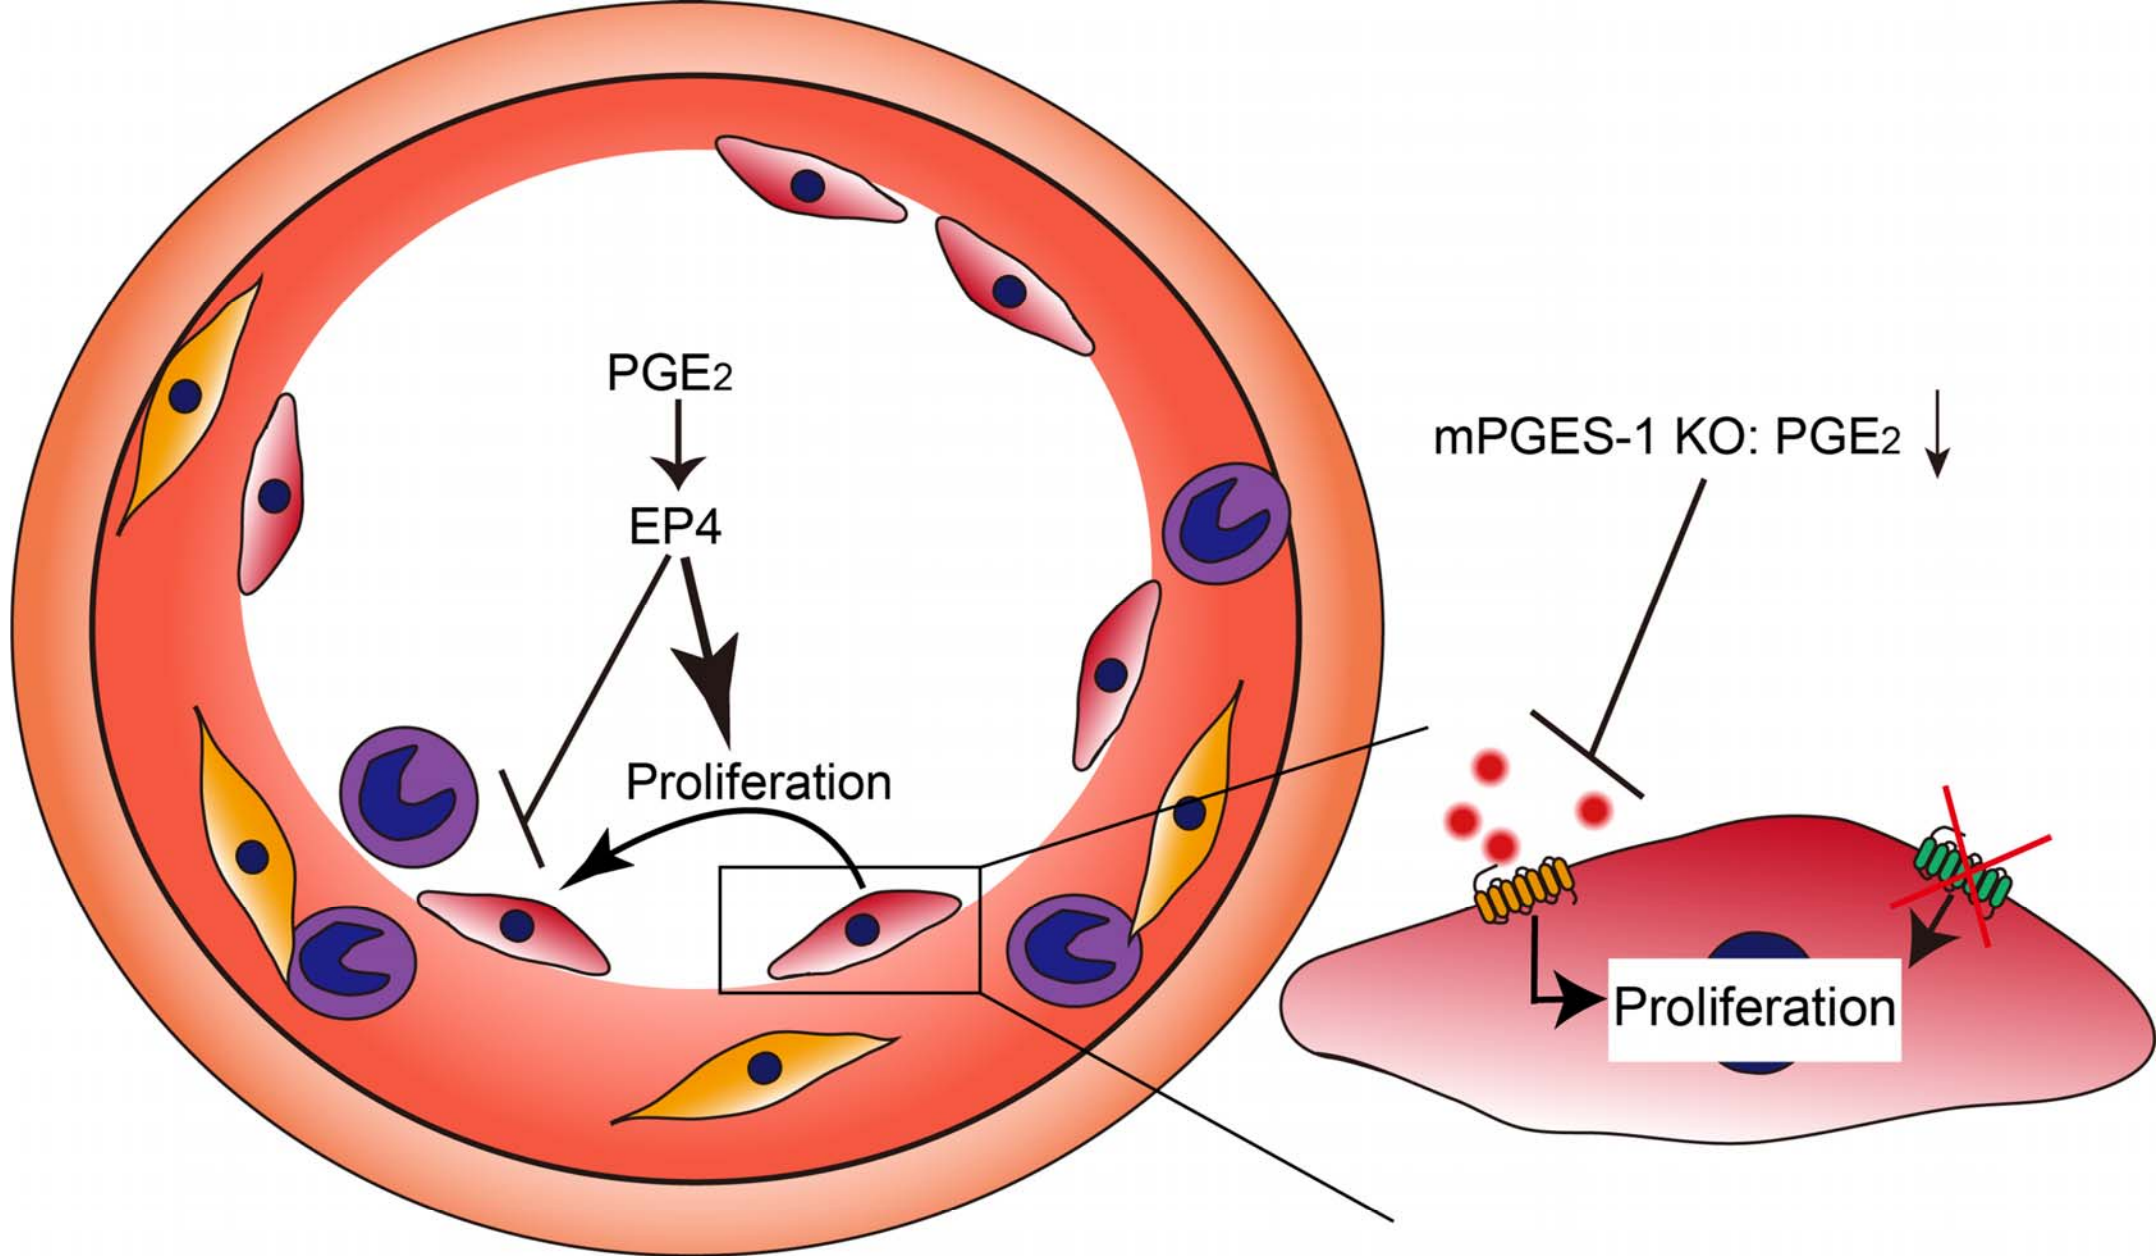

 Endothelial cells

 Smooth muscle cells

 Leukocytes

 EP4

 IP

 PGE<sub>2</sub>

Supplement: NIHMS952208-supplement-mPGES1-EP4_in_vascular_remodeling.pdf [file NIHMS952208-supplement-mPGES1-EP4_in_vascular_remodeling.pdf]
